# Supplementary material for: Transcriptomic Analysis of Diffuse Intrinsic Pontine Glioma (DIPG) Identifies a Targetable ALDH-Positive Subset of Highly Tumorigenic Cancer Stem-like Cells
Source: Oxford University Press journal article supplement (doi:10.1158/1541-7786.mcr-20-0464), 2020-10-26
Supplement: 15417786mcr200464-sup-243672_2_supp_6636785_qcb08v.pdf [file 15417786mcr200464-sup-243672_2_supp_6636785_qcb08v.pdf]

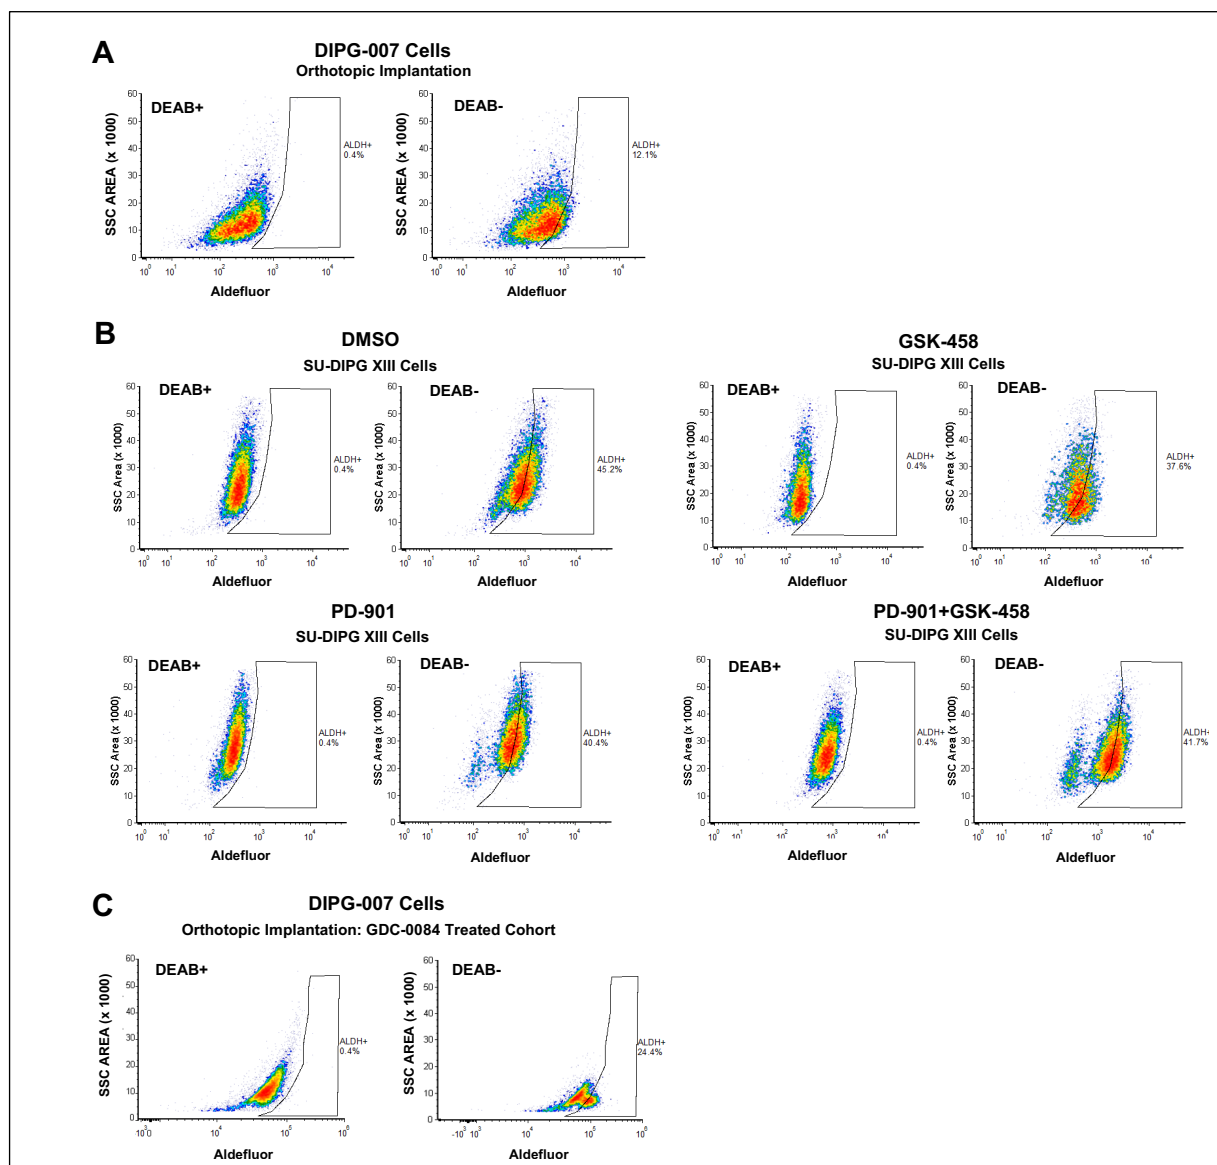

**Supplemental Figure S1.** FACS analysis of Aldefluor stained SU-DIPG XIII cells. Representative dot blots are shown for A-B. **A.** Cells were treated 2 hours with respective drug or equimolar DMSO wherein bromouridine was added in last 30 min prior to Aldefluor assay. **B.** FACS of DIPG-007 Luc cells used for implantation in the orthotopic model described in Figure 4. **C.** FACS of DIPG-007 Luc cells used for implantation in the orthotopic model. Mice were randomized into two treatment groups (vehicle control, GDC-0084) as described for Figure 7.

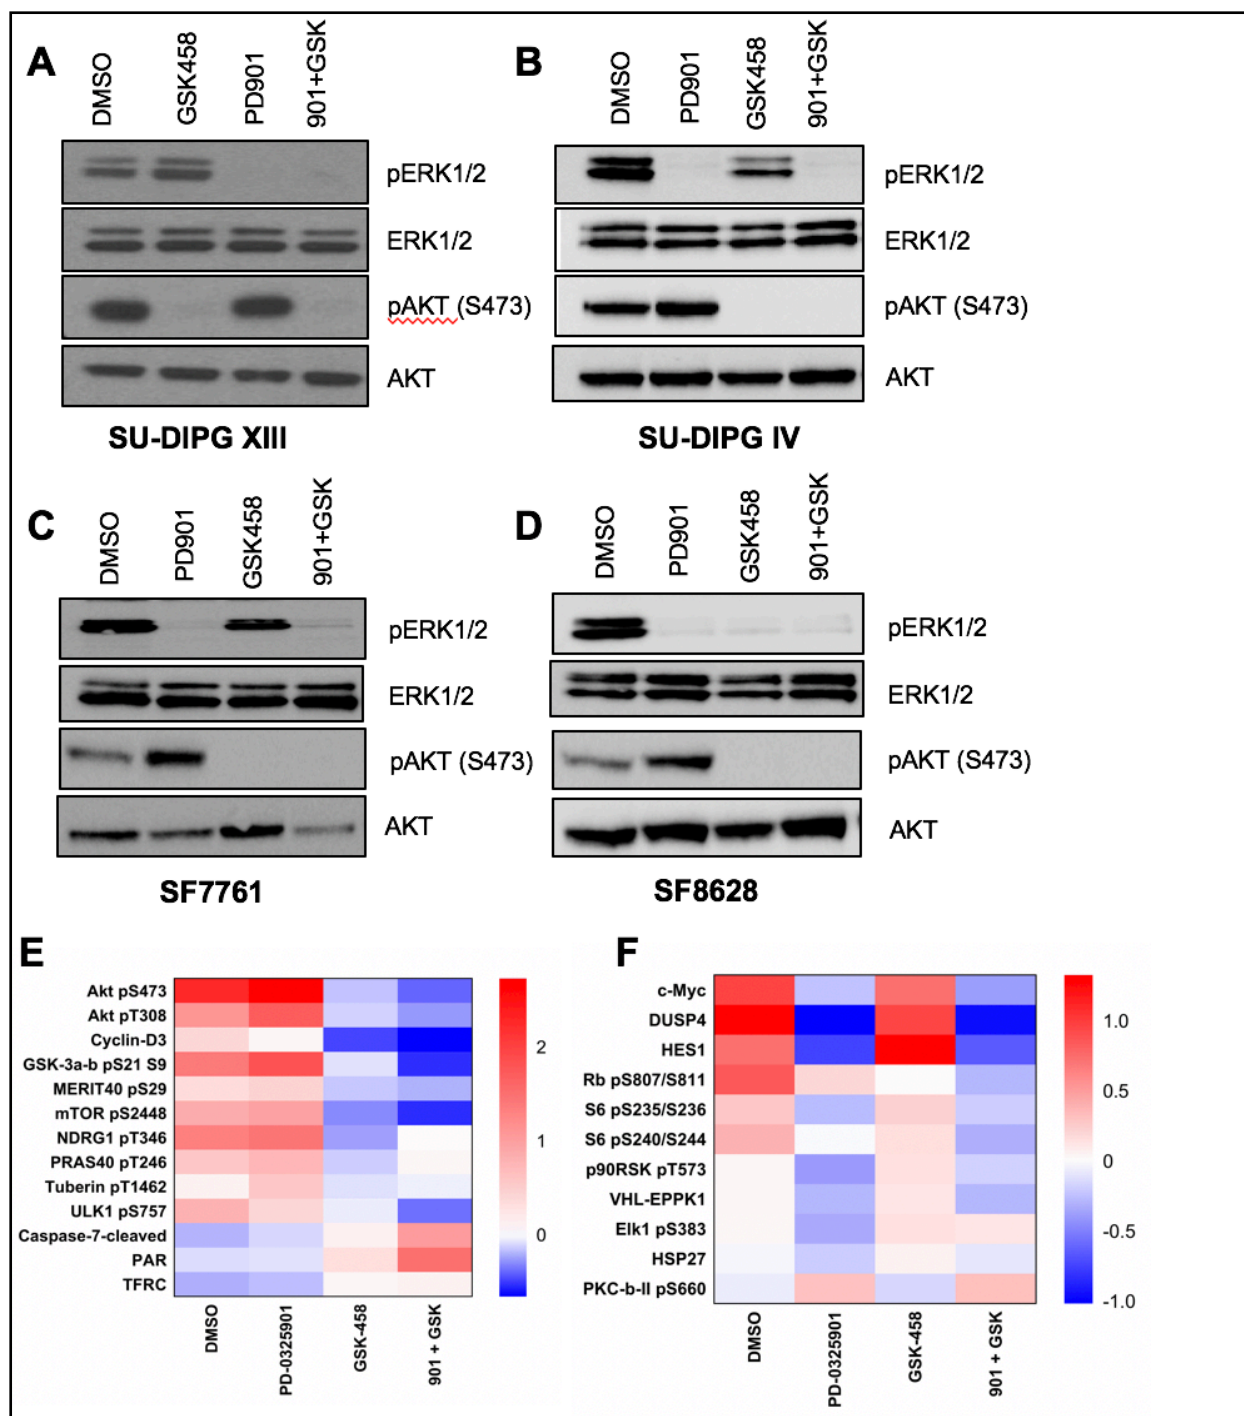

**Supplemental Figure S2: Downstream signaling changes by inhibition of MAPK and PI3K/mTOR in DIPG cells.** A.-D. SU-DIPG XIII, SU-DIPG IV, SF7761 and SF8628 cells were treated with 10  $\mu$ M PD-901, GSK-458 or combination (901+GSK; 10 $\mu$ M each) for 2 hours and immunoblots of pERK 1/2 and pAKT (S473) were performed, respectively. E. and F. Lysates obtained from cells treated as described above for 6 hrs were analyzed by reverse phase protein array (RPPA). Heatmap of RPPA data, MAPK and PI3K/mTOR induced protein expression, respectively. Relative protein expression changes represented as norm log<sub>2</sub> median centered.

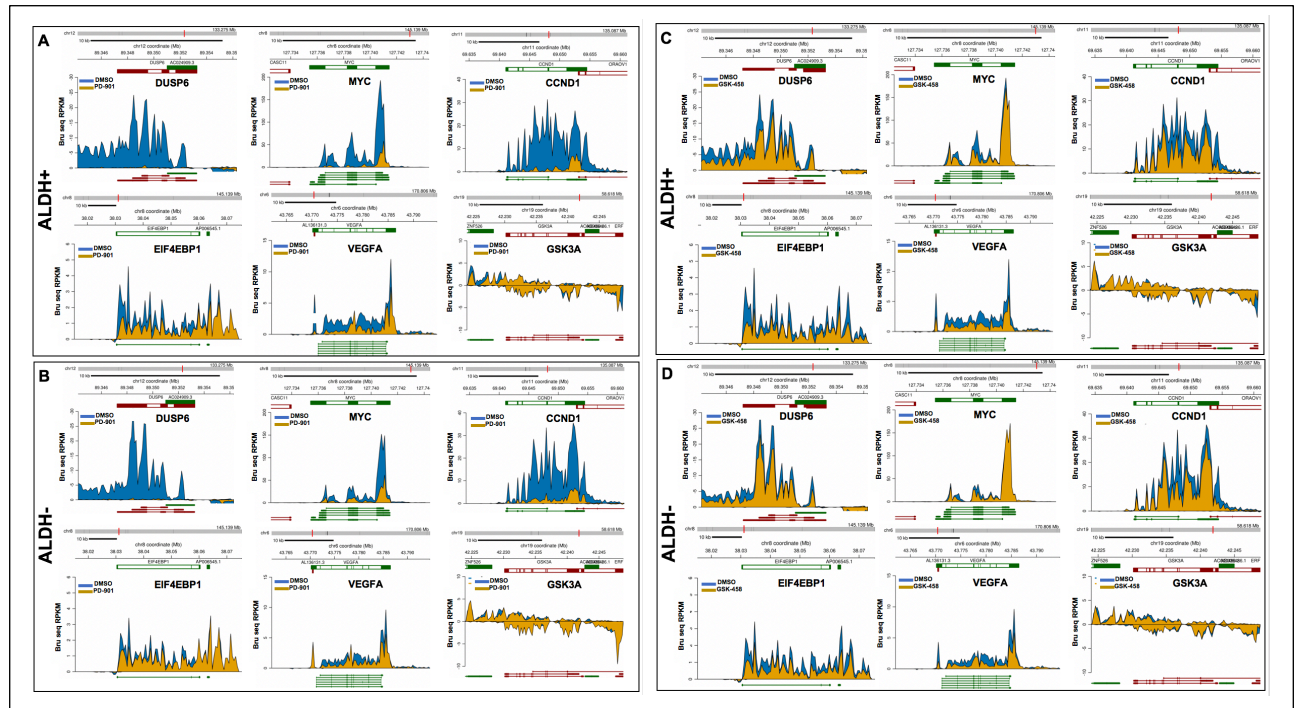

**Supplemental Figure S3.** Bru-sequencing transcriptome analysis identifies gene sets regulated by MAPK and PI3K/mTOR inhibition in ALDH positive SU-DIPG XIII cells. **A -D.** Bru-seq was performed on single agent treated (yellow) PD-901 (**A, B**), GSK-458 (**C, D**) or DMSO (blue) treated SU-DIPG XIII ALDH +/- cells. Sequencing reads from nascent RNA expressed as reads per thousand base pairs per 1 million reads (RPKM) and mapped to target genes. Expression changes of MAPK (*DUSP6*, *MYC*, *CCND1*) and PI3K (*VEGFA*, *4EBP1*, *GSK3A*) target genes are presented.

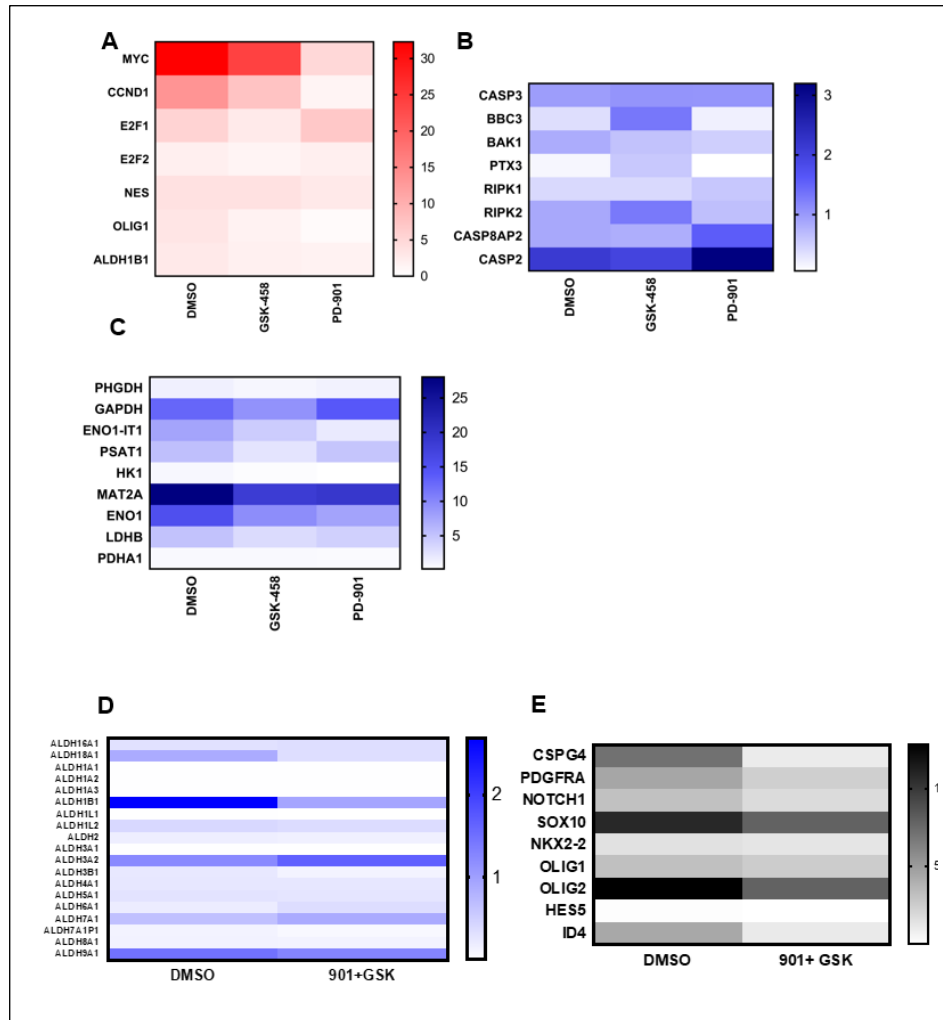

**Supplemental Figure S4. A-C.** Heatmaps of Bru-seq RPKM values in single agent treated (901 or GSK) ALDH+ SU-DIPG XII cells highlight treatment effects on “stemness” and DDR genes (A) apoptotic genes (B) and metabolic genes (C). **D-E.** Heatmaps of Bru-seq RPKM values in combination treated (901+GSK) ALDH+ SU-DIPG XII cells on ALDH family genes (D) and markers of OPC differentiation (E).

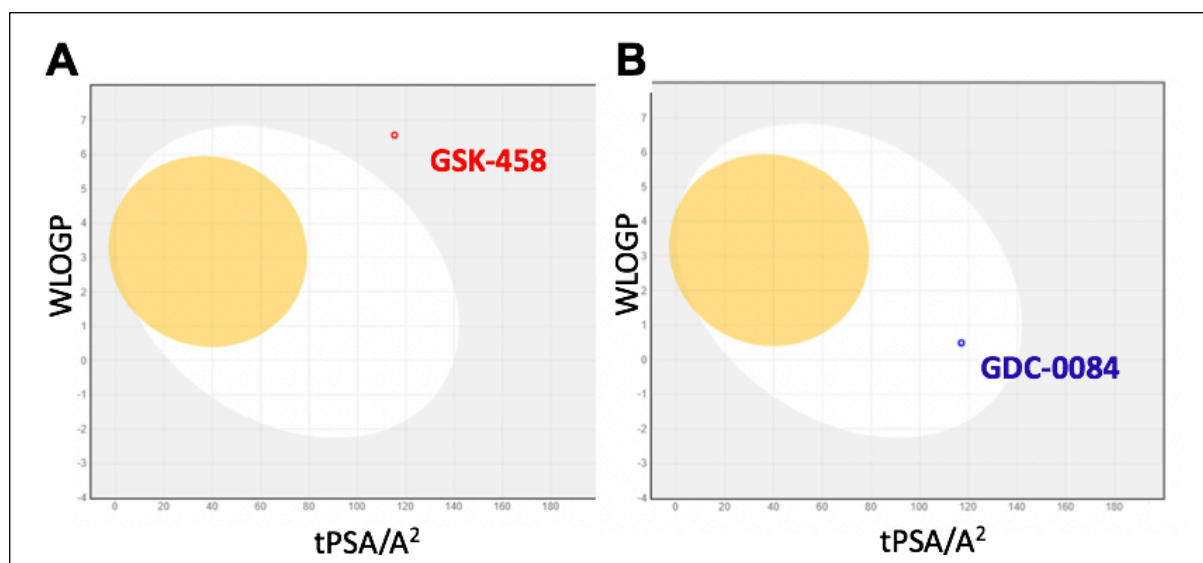

**Supplemental Figure S5: A.-B.** Illustrative result of BOILED-Egg predictive model for GSK-458 and GDC-0084, respectively.

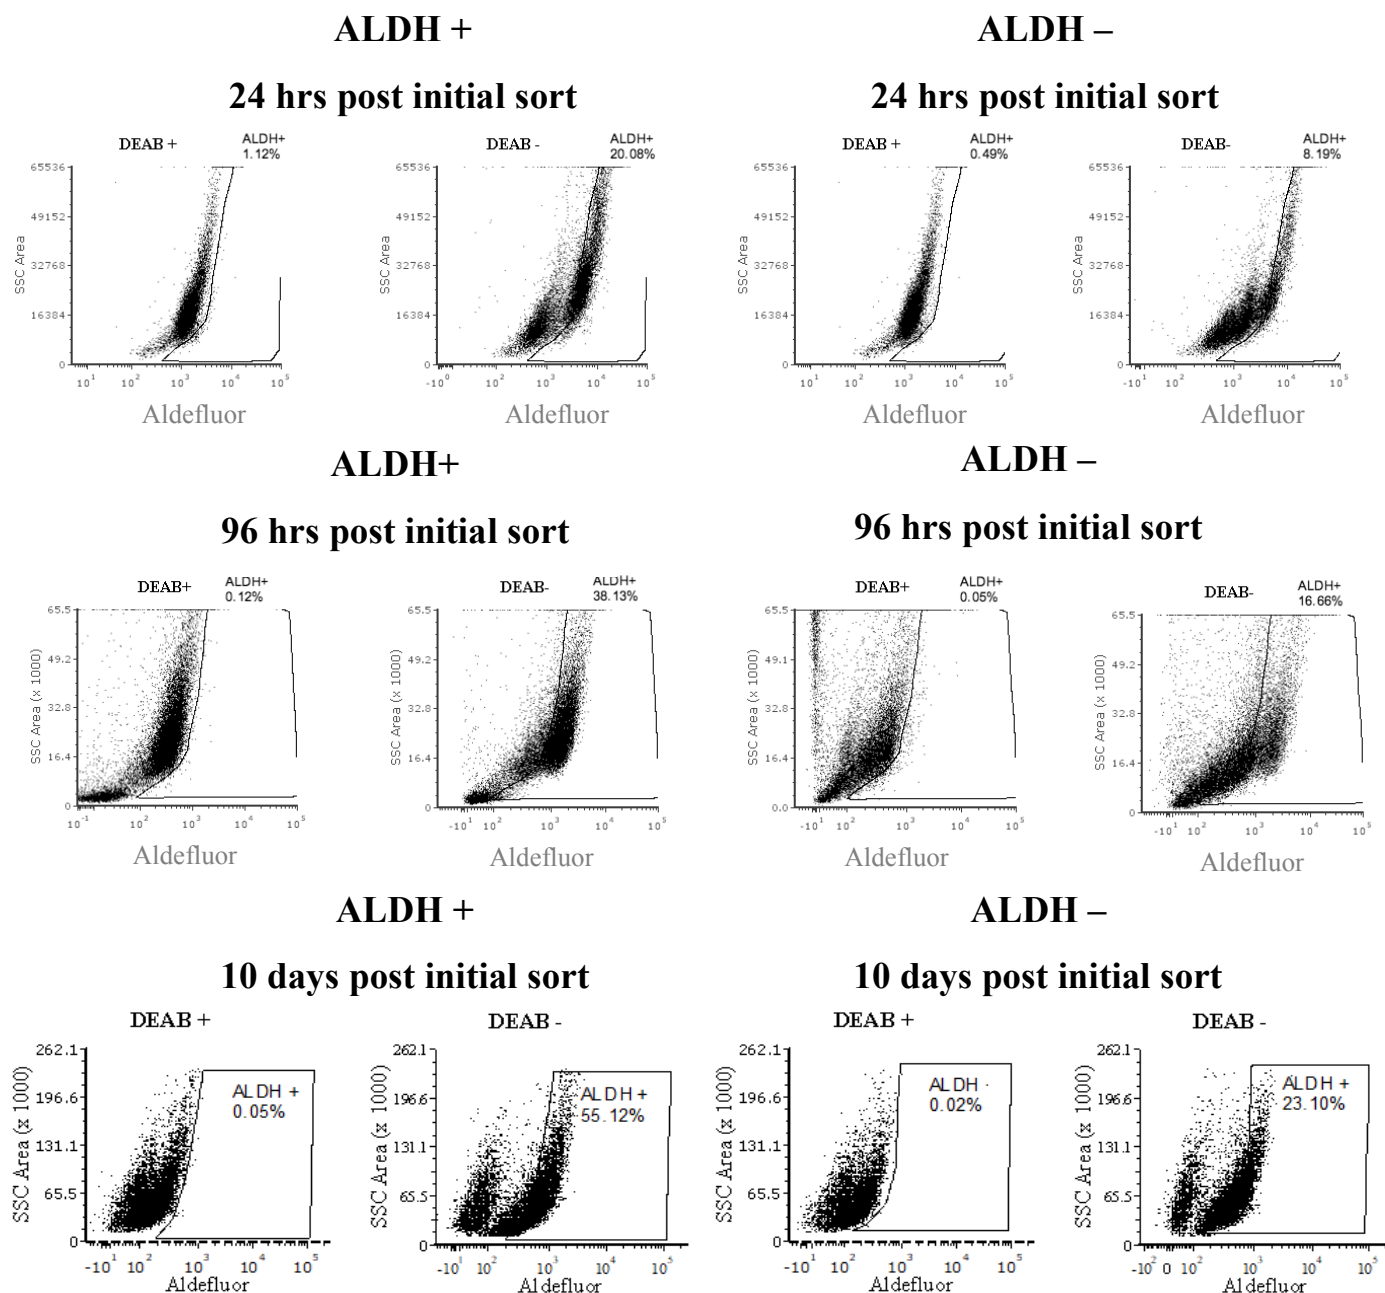

**Supplemental Figure S6: A-C.** SU-DIPG-XIII cells were Aldefluor stained and sorted into an ALDH+ and ALDH- population. After sorting cells were plated into neurosphere TSM media and cultured for either 24 (A), 96 hrs (B) or 10 days (C) before cells in each cell population (ALDH +/-) were Aldefluor stained and analyzed by flow cytometry for ALDH expression.

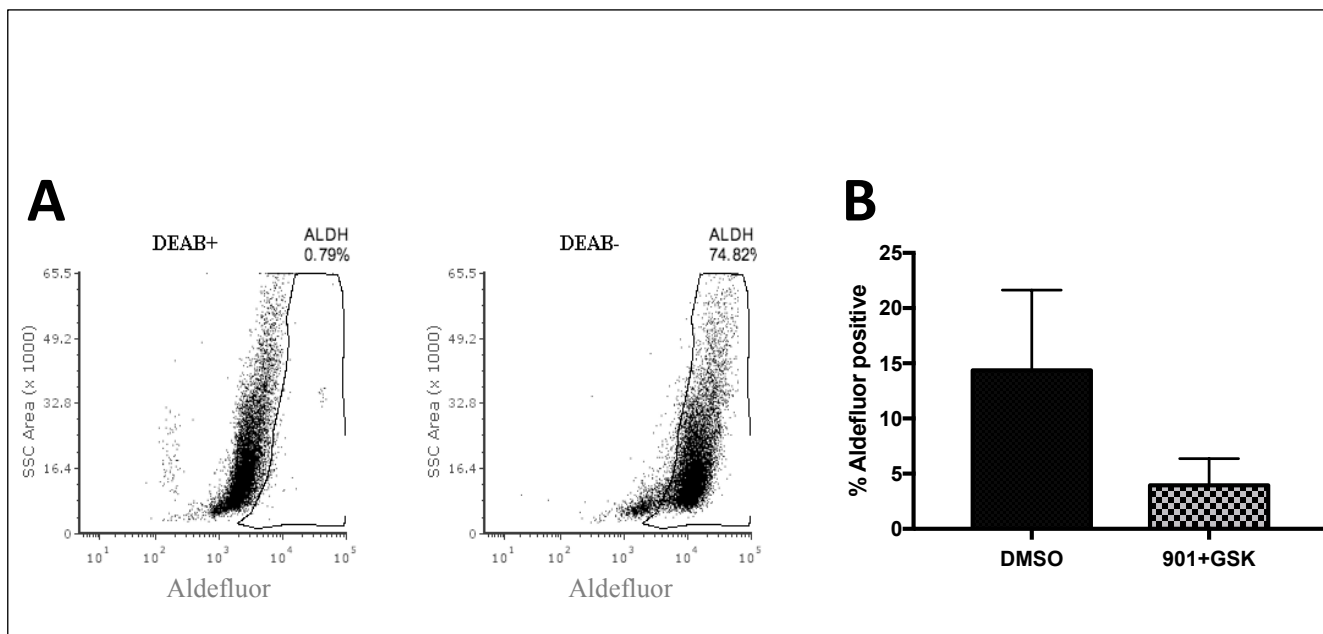

**Supplemental Figure S7: A.** Aldefluor stain and FACS of SU-DIPG XIII cells. **B.** ALDH+ cells were treated with 50 nM 901+GSK each and 24 hrs later Aldefluor re-stained and analyzed by flow cytometry.

**Supplemental Table 1: Characteristics of Patient-Derived Diffuse Intrinsic Pontine Glioma (DIPG) Cells.**

| Cell line        | Mutations                        | Tissue Origin               | Prior Therapy                                      | Source/Ref.                                       | *ALDH+<br>(Aldefluor) | *CD133+<br>(APC) | *ALDH/<br>CD133+ |
|------------------|----------------------------------|-----------------------------|----------------------------------------------------|---------------------------------------------------|-----------------------|------------------|------------------|
| SU-DIPG IV       | H3.1K27M,<br>MDM4,ACVR1<br>G328V | Early postmortem<br>autopsy | Radiotherapy,<br>cetuximab,<br>irinotecan          | Grasso et al.<br><i>Nature Medicine</i><br>(2015) | 31.41 ± 3.17          | 0.16 ± 0.14      | 0.08 ± 0.083     |
| SU-DIPG XIII     | H3.3K27M                         | Early postmortem<br>autopsy | Radiotherapy                                       | Grasso et al.<br><i>Nature Medicine</i><br>(2015) | 24.54 ± 7.80          | 98.42 ± 0.25     | 18.21 ± 2.28     |
| SF7761           | H3.3K27M                         | Surgical biopsy             | None                                               | Millipore                                         | 0.01 ± 0.01           | 46.3 ± 22.75     | 0.14 ± 0.090     |
| SF8628           | H3.3K27M                         | Surgical biopsy             | None                                               | Millipore                                         | 8.27 ± 4.29           | 0.35 ± 0.35      | 0.027 ± 0.027    |
| HSJD-DIPG<br>007 | H3.3K27M;<br>ACVR1               | Early postmortem<br>autopsy | Irinotecan-cisplatin                               | Vinci et al.<br><i>Nature Medicine</i><br>(2018)  | 55.15 ± 4.26          | 2.75 ± 0.87      | 0.613 ± 0.32     |
| SU-DIPG 29       | H3.3K27M                         | Early postmortem<br>autopsy | Radiotherapy;<br>panobinostat;<br>avastin; THC oil | Qin et al. <i>Cell</i><br>(2017)                  | 3.11 ± 0.52           | 20.12 ± 2.48     | 0.65 ± 0.26      |

\*Data presented with mean values ± SEM of percentages from three independent flow cytometric analyses.



**Supplemental Table 2.** Selected Genes Upregulated in ALDH+ DIPG Cells.

| Upregulated Gene | log2 Fold Change | Function                          |
|------------------|------------------|-----------------------------------|
| PLK1             | 1.834            | G2 to M transition, Cell Division |
| GTSE1            | 1.691            | DNA Damage Response               |
| AURKA            | 1.685            | Proliferation, Cell Cycle         |
| INCENP           | 1.680            | Cell Division, Cell Cycle         |
| TACC3            | 1.676            | Cell Division, Cell Cycle         |
| IQGAP3           | 1.599            | Proliferation, Metastasis         |
| FAM83D           | 1.571            | Proliferation, Cell Cycle         |
| RECQL4           | 1.263            | Homologous Recombination          |
| PKMYT1           | 0.870            | G2 to M Transition                |
| CHEK2            | 0.827            | DNA Repair, Cell Cycle Arrest     |
| E2F2             | 0.737            | Stem Cell, Cell Cycle             |
| MYC              | 0.381            | stem cell, proliferation          |
| PCNA             | 0.269            | DNA Damage Response               |
| BRCA1            | 0.224            | Homologous Recombination          |
| NES              | 0.218            | Stem Cell Marker                  |
| OLIG1            | 0.196            | Stem Cell Marker                  |
| E2F1             | 0.123            | Stem Cell, Cell Cycle             |
| RAD51            | 0.111            | Homologous Recombination          |
| RFC2             | 0.101            | DNA Damage Response               |

**Supplemental Table 3.** Selected Metabolome Genes Upregulated in ALDH+ DIPG Cells.

| Upregulated Gene | log2 Fold Change | Gene Name                                |
|------------------|------------------|------------------------------------------|
| PHGDH            | 0.405            | Phosphoglycerate Dehydrogenase           |
| GAPDH            | 0.432            | Glyceraldehyde-3-Phosphate Dehydrogenase |
| ENO1-IT1         | 0.315            | Enolase One Ionic Transcript 1           |
| PSAT1            | 0.256            | Phosphoserine Aminotransferase 1         |
| HK1              | 0.209            | Hexokinase 1                             |
| MAT2A            | 0.046            | Methionine Adenosyltransferase 2A        |
| ENO1             | 0.011            | Enolase 1                                |
| LDHB             | -0.034           | Lactate Dehydrogenase B                  |
| PDHA1            | -0.055           | Pyruvate Dehydrogenase                   |

**Supplementary Table 4: RT-qPCR primer sequences.**

| Gene name | Sequence 5'-3'             |
|-----------|----------------------------|
| GAPDH     | F: CGCTGAGTACGTCGTGGAGTC   |
|           | R: GCAGGAGGCATTGCTGATGA    |
| MYC       | F: CAGCTGCTTAGACGCTGGATT   |
|           | R: GTAGAAATACGGCTGCACCGA   |
| E2F1      | F: CAGCTGCTTAGACGCTGGATT   |
|           | R: GTAGAAATACGGCTGCACCGA   |
| EIF4EBP 1 | F: CTATGACCGGAAATTCCTGATGG |
|           | R: CCGCTTATCTTCTGGGCTA     |
| E2F2      | F: CGTCCCTGAGTTCCCAACC     |
|           | R: GCGAAGTGTACATACCGAGTCTT |
| GSK3A     | F: GGAAAGGCATCTGTCGGGG     |
|           | R: GAGTGGCTACGACTGTGGTC    |
| DUSP6     | F: GTTTTCCCTGAGGCCATTT     |
|           | R: TAGGCATCGTTCATCGACAG    |
| VEGF      | F: TGCCAAGTGGTCCAAG        |
|           | R: GTGAGGTCTTGATCCG        |
| CCND1     | F: ACGAAGGTCTGCGCGTGTT     |
|           | R: CCGCTGGCCATGAACTACCT    |
| OLIG1     | F: TACTATGCGGTTTCCCAGGC    |
|           | R: GCTGAGTAGGGCAGGATGA     |
| ENO1      | F: TTACCACAACCTGAAGAATG    |
|           | R: TCCAGGCCTTCTTTATTCTC    |
| MAT2A     | F: CTTGTTCAAGTCTCTTATGC    |
|           | R: TGCAGTCCTCTGATAAATTG    |
| PSAT1     | F: GAGTTTGACTTTATACCCGATG  |
|           | R: CTGTTCCCATGAACTTCTTC    |
